# Supplementary material for: Precise control of Cu2O nanostructures and LED-assisted photocatalysis
Source: Royal Society of Chemistry journal article supplement (doi:10.1039/c6ra19037e), 2016-01-01
Supplement: c6ra19037e1.pdf [file c6ra19037e1.pdf]

## Precise control of $\text{Cu}_2\text{O}$ nanostructures and LED-assisted photocatalysis

Yang Su<sup>a</sup>, Arokia Nathan\*<sup>a</sup>, Hanbin Ma<sup>a</sup>, and Hua Wang<sup>b</sup>

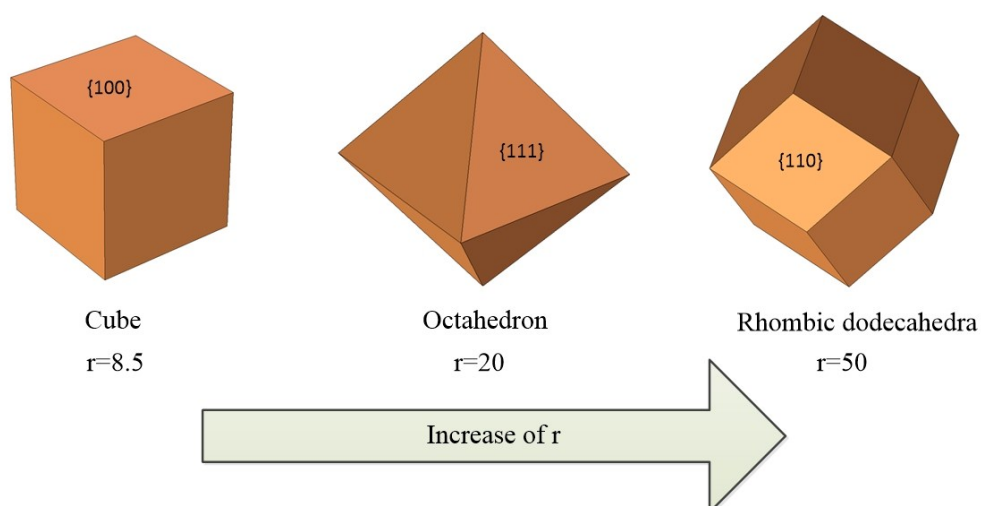

**Fig.S1** Schematic illustration of the synthesis procedure of  $\text{Cu}_2\text{O}$  nanocrystals of various morphologies. The morphologies can be precisely controlled by adjusting the molar ratio 'r' of hydroxylamine hydrochloride and copper salt.

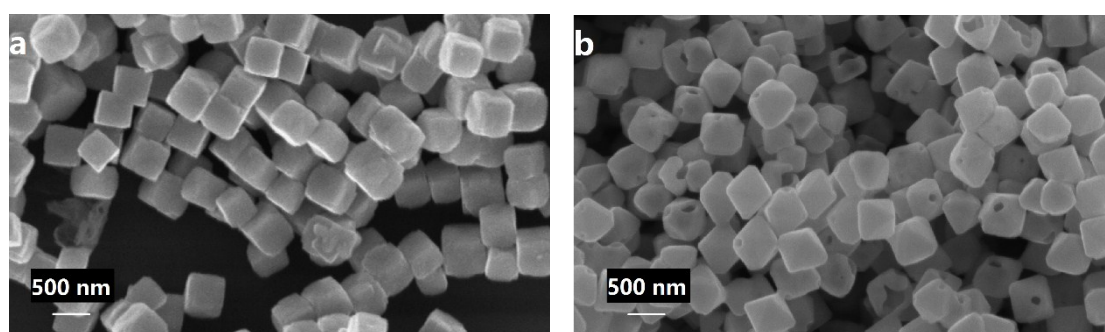

**Fig.S2** SEM images of cubic and octahedral  $\text{Cu}_2\text{O}$  nanocrystals: (a) SEM image of cubic  $\text{Cu}_2\text{O}$  nanocrystals. (b) SEM image of octahedral  $\text{Cu}_2\text{O}$  nanocrystals.

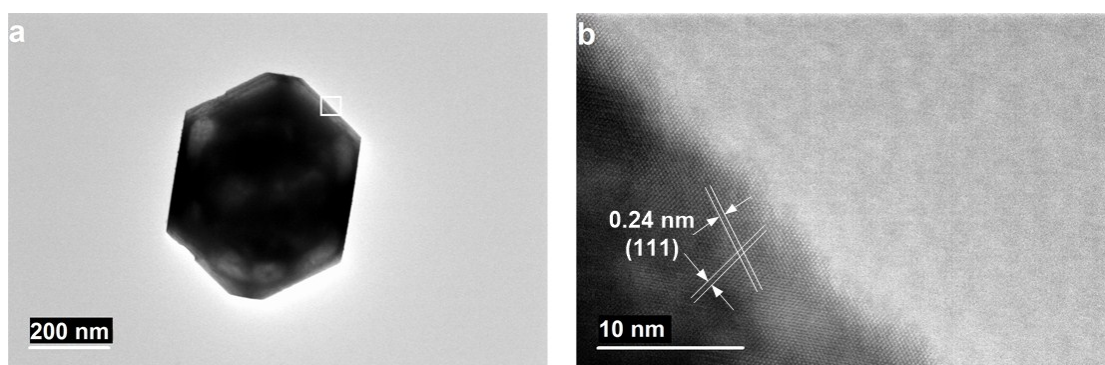

**Fig.S3** TEM images of rhombic dodecahedral  $\text{Cu}_2\text{O}$  nanocrystals: (a) TEM image viewed along  $[110]$  direction. (b) High-resolution TEM image of the square region of  $\text{Cu}_2\text{O}$  nanocrystals.

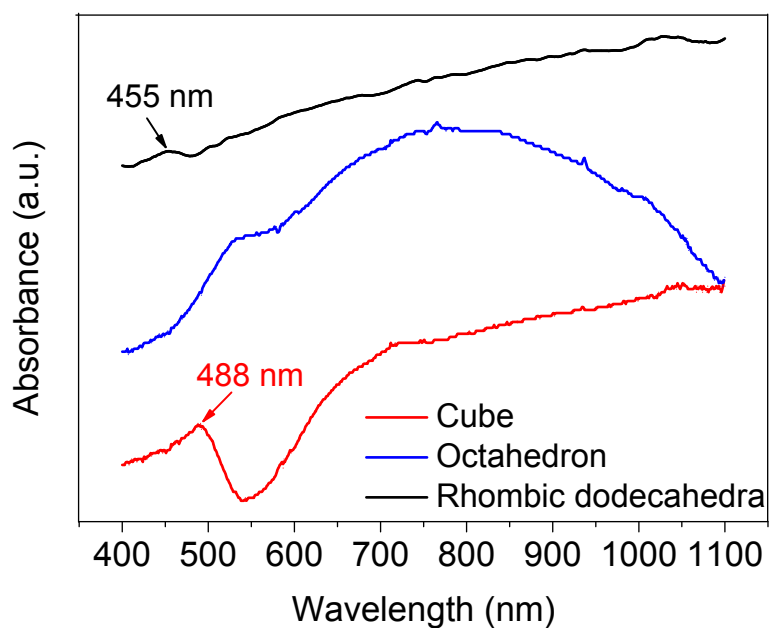

**Fig.S4** UV-vis spectra of Cu<sub>2</sub>O nanocrystals. Cu<sub>2</sub>O nanocrystals with various morphologies show different wavelength peaks.

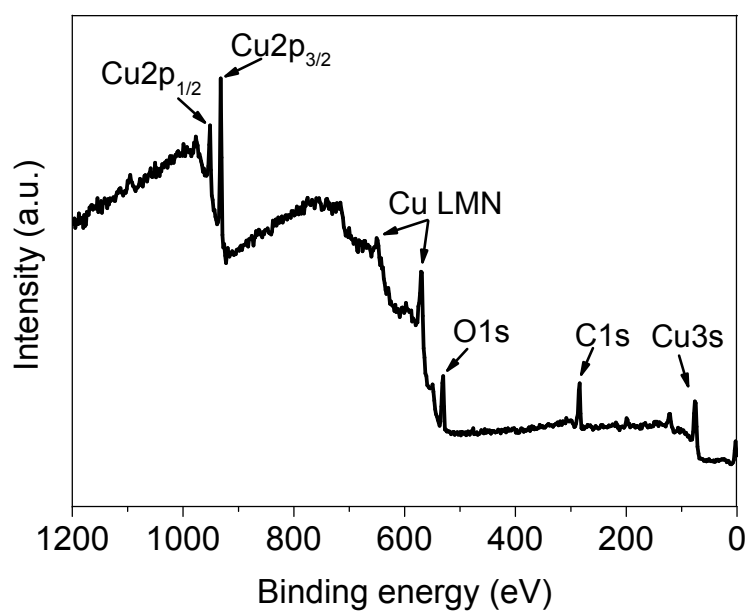

**Fig.S5** XPS spectra of rhombic dodecahedral Cu<sub>2</sub>O nanocrystals.

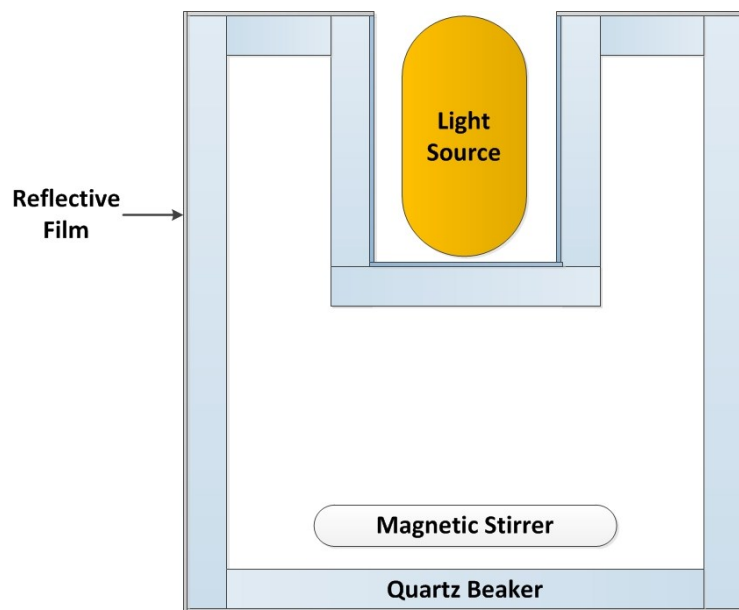

**Fig.S6** Cross section of photocatalytic reactor.

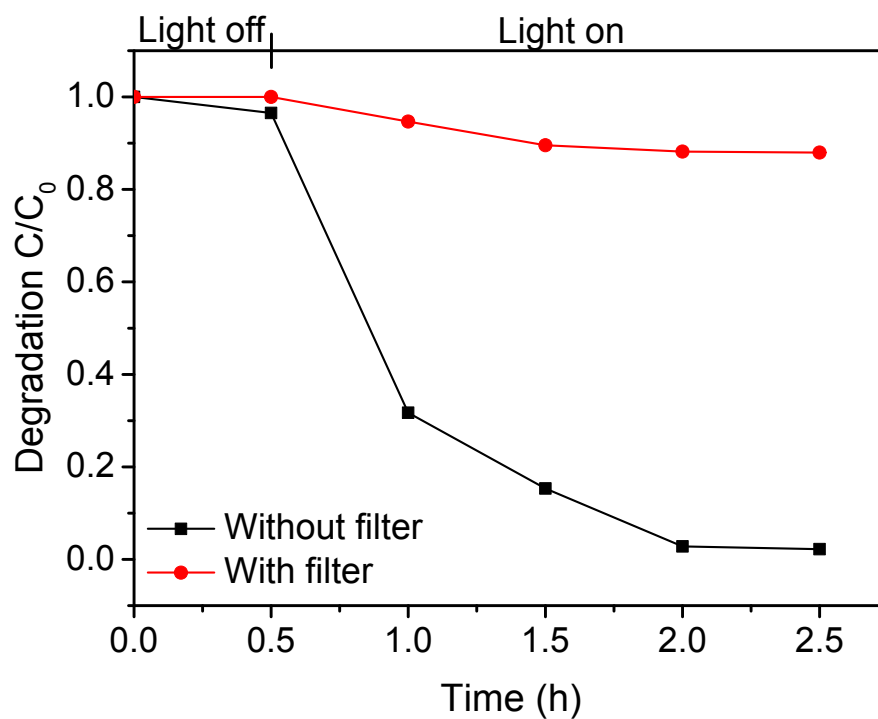

**Fig.S7** Degradation of MO by rhombic dodecahedral  $\text{Cu}_2\text{O}$  photocatalysts with and without 500-nm filter.

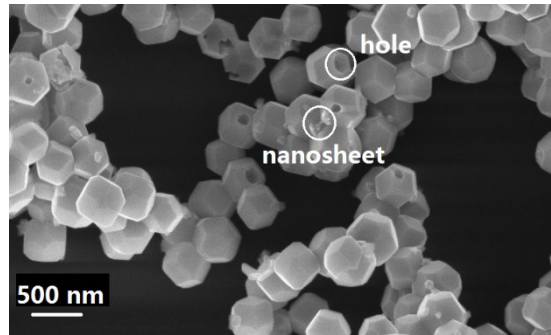

**Fig.S8** SEM image of rhombic dodecahedral  $\text{Cu}_2\text{O}$  photocatalysts after five cycles of photocatalytic reactions. Some holes and nanosheets can be observed on the surface of  $\text{Cu}_2\text{O}$  nanocrystals, indicating the  $\{110\}$  facets gradually transforming into nanosheets during photocatalytic degradation.

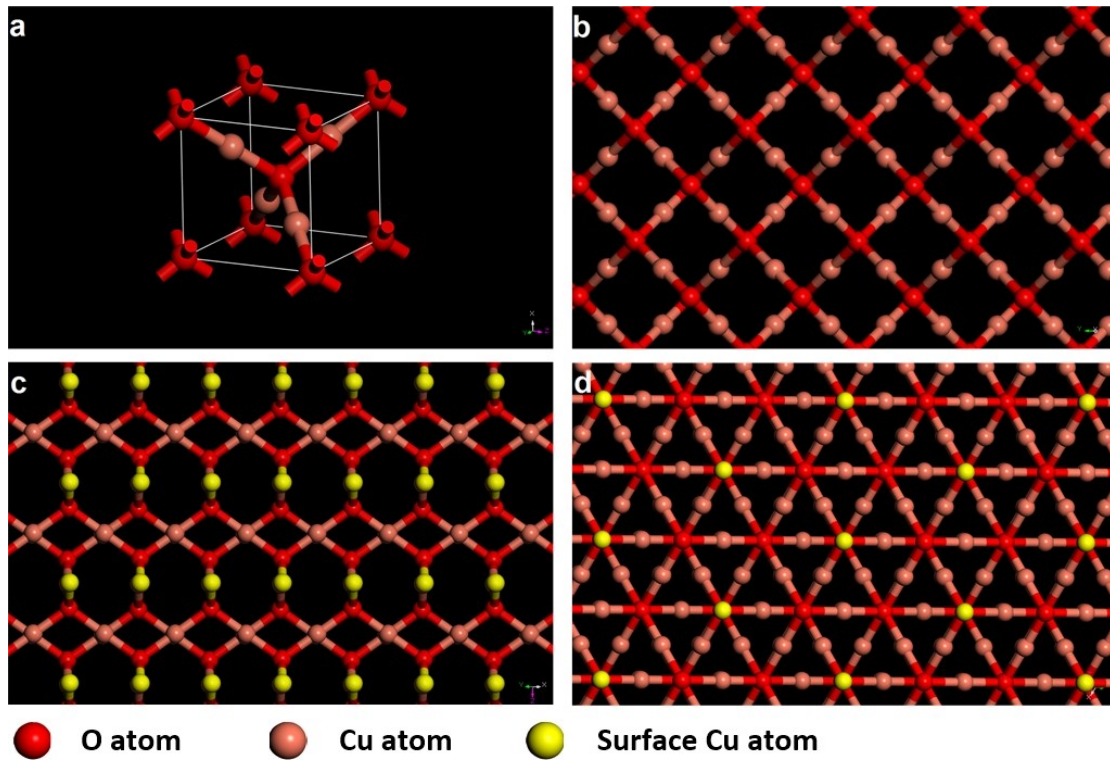

**Fig.S9** Structure and atomic arrangement of  $\text{Cu}_2\text{O}$  nanocrystals: (a) unit cell of  $\text{Cu}_2\text{O}$ . (b) atomic arrangement of  $\{100\}$  plane. (c) atomic arrangement of  $\{110\}$  plane. (d) atomic arrangement of  $\{111\}$  plane.

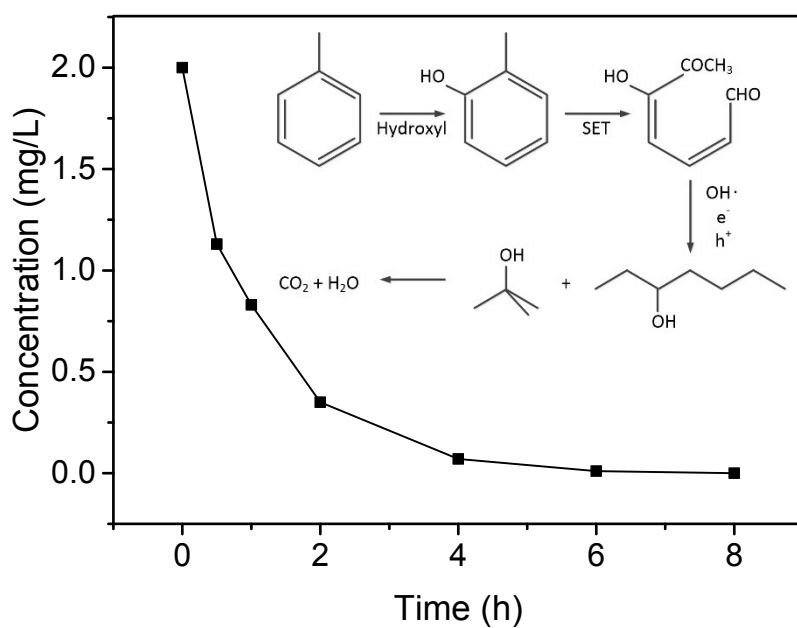

**Fig.S10** Concentration of toluene versus reaction time using rhombic dodecahedral Cu<sub>2</sub>O photocatalysts. Inset: degradation mechanism of toluene. Toluene is degraded by hydroxyl-like chemistry and SET chemistry to form molecules including 3-heptanol and 2-methyl-2-propanol. The intermediate products further react with electrons, holes and hydroxyl species to form carbon dioxide and water.
